# Supplementary material for: The development of quick, robust, quantitative phenotypic assays for describing the host–nonhost landscape to stripe rust
Source: Front Plant Sci. 2015 Oct 27;6:876. doi: 10.3389/fpls.2015.00876 (PMC4621417; doi:10.3389/fpls.2015.00876)
Supplement: Supplementary file 2 [file Table_2.XLSX]

## Sheet: Sheet1
Supplementary Table 2. Accessions of B. distachyon used for inoculation with P. striiformis f. sp. tritici.
		P. striiformis f. sp. tritici isolate 08/21		P. striiformis f. sp. tritici isolate 08/501
Accession	Source	Leaf browning	pCOL	Leaf browning	pCOL
Bd21	USDA-ARS	0.5	0.24881	2.5	0.442828
Bd21-3	USDA-ARS	0	0.0178571	0	0.063757
Adi-1	USDA-ARS	0	0.0596805	0	0.0436739
Adi-2	USDA-ARS	0	0	0	0.00568783
Adi-3	USDA-ARS	0	0.04302	0	0.0381915
Adi-4	USDA-ARS	0	0.081102	0	0.112916
Adi-5	USDA-ARS	0	0.0848395	0	0.0769015
Adi-6	USDA-ARS	0	0.00438596	0	0.018761
Adi-7	USDA-ARS	0	0.0541371	0.5	0.257335
Adi-8	USDA-ARS	0	0	0	0.00664811
Adi-9	USDA-ARS	0	0	0	0.0124421
Adi-10	USDA-ARS	0	0	0	0.0251736
Adi-11	USDA-ARS	0	0.0834507	0	0.0234178
Adi-12	USDA-ARS	0	0.189952	0	0.245213
Adi-13	USDA-ARS	0	0.0481481	0.5	0.125869
Adi-14	USDA-ARS	0	0.00347222	0	0.00598958
Adi-15	USDA-ARS	0	0	0	0.00553355
Adi-16	USDA-ARS	0	0	0	0.0306503
Adi-17	USDA-ARS	0	0	0	0
Adi-18	USDA-ARS	0	0	0	0
Bis-1	USDA-ARS	0	0	0	0.0042735
Gaz-1	USDA-ARS	0	0.0675595	0	0.0994433
Gaz-2	USDA-ARS	0	0	0	0
Gaz-3	USDA-ARS	0	0	0	0
Gaz-4	USDA-ARS	0	0	0	0
Gaz-5	USDA-ARS	0	0	0	0.00231482
Gaz-6	USDA-ARS	0	0	0	0.00215517
Gaz-7	USDA-ARS	0	0	0	0
Gaz-8	USDA-ARS	0	0.00854701	0	0
Gaz-9	USDA-ARS	0	0
Kah-1	USDA-ARS	0	0	0	0
Kah-2	USDA-ARS	0	0.0152396	0	0.0141257
Kah-3	USDA-ARS	0	0	0	0.0113636
Kah-4	USDA-ARS	0	0	0	0.0161119
Kah-5	USDA-ARS	0	0	0	0
Kah-6	USDA-ARS	0	0.0171449	0	0.188241
Koz-1	USDA-ARS	0	0.015055	0	0.109925
Koz-2	USDA-ARS	0	0	0	0.043311
Koz-3	USDA-ARS	0	0	0	0.0937657
Koz-4	USDA-ARS	0	0.201024	0.5	0.142975
Koz-5	USDA-ARS	0	0	0	0
Tek-2	USDA-ARS	0.5	0.185603	3	0.601039
Tek-4	USDA-ARS	3.5	0.576352	3	0.841272
Tek-5	USDA-ARS	2	0.572072
Tek-6	USDA-ARS	3	0.60232
Tek-7	USDA-ARS	3	0.822063	3.5	0.822823
Tek-8	USDA-ARS	2.5	0.565217
Tek-9	USDA-ARS	1.5	0.505452	2.5	0.718503
Tek-10	USDA-ARS	2.5	0.477075	3.5	0.851669
Tek-12	USDA-ARS	3	0.935617	4	0.724585
ABR1	Aberyswyth University	0	0
ABR2	Aberyswyth University	0	0.00416667	0.5	0.0913971
ABR4	Aberyswyth University	0	0	0	0.036029
ABR6	Aberyswyth University	0	0.0045045	0	0
ABR7	Aberyswyth University	0	0	0	0
ABR8	Aberyswyth University	1	0.351273
ABR100	Aberyswyth University	4	0.650191
Abi1	Aberyswyth University	0.5	0.121965	1	0.165921
Arc1	Aberyswyth University	0	0.0910935	0.25	0.0308333
Arn2	Aberyswyth University	0.5	0.0647216	2	0.317464
Ban2	Aberyswyth University	1	0.209091	1.5	0.486584
Bar2	Aberyswyth University	0	0.214128	0	0.083081
Bel1	Aberyswyth University	3.5	0.917219	3.5	0.575535
Bie1	Aberyswyth University	0	0.0866261	0	0.0773522
Bou1	Aberyswyth University	0	0.0748321	0.5	0.228098
Cas2	Aberyswyth University	1.5	0.440082	3	0.671773
Cel1	Aberyswyth University	0	0	0	0
Fon2	Aberyswyth University	0	0	0	0.0307391
Foz1	Aberyswyth University	0	0	0	0
Gal1	Aberyswyth University	0	0.114899	1	0.157373
Jer1	Aberyswyth University	0	0.0042735	0	0.0740362
Luc1	Aberyswyth University	1.5	0.275097	3.5	0.628297
Mig3	Aberyswyth University	0	0.02148	0	0.044933
Mir1	Aberyswyth University	0	0.0760591	0.5	0.122923
Mon1	Aberyswyth University	0.5	0.366026	0.5	0.468601
Mon3	Aberyswyth University	2	0.632353	0.5	0.601248
Mur3	Aberyswyth University	0	0.0376344	0.5	0.0356886
Pal3	Aberyswyth University	0	0.0254036	0	0.0191509
Per1	Aberyswyth University	0	0.0644347
Pob1	Aberyswyth University	2.5	0.685979	3.5	0.549314
Rea1	Aberyswyth University	0	0.00416667
Rei7	Aberyswyth University	0	0	0	0.00585938
Rod1	Aberyswyth University	0.5	0.127229	1.5	0.208949
Sar2	Aberyswyth University	1	0.174691	0	0.76514
Sig2	Aberyswyth University	0	0.0227525	0	0.0149085
Tor1	Aberyswyth University	0.5	0.413492	1	0.416126
Uni2	Aberyswyth University	1.5	0.495614	1	0.273456
Yas3	Aberyswyth University	0	0
BdTR1A	Sabancı University	0	0.0047619
BdTR1B	Sabancı University	0	0
BdTR1C	Sabancı University	0	0
BdTR1D	Sabancı University	0	0.0331301
BdTR1E	Sabancı University	0	0
BdTR1F	Sabancı University	0	0
BdTR1G	Sabancı University	0	0.0291982
BdTR1H	Sabancı University	0	0
BdTR1I	Sabancı University	0	0.0159698
BdTR1J	Sabancı University	0	0.00775194
BdTR1K	Sabancı University	0	0.0199612
BdTR1M	Sabancı University	0	0
BdTR1N	Sabancı University	0	0.00438596
BdTR2A	Sabancı University	0	0
BdTR2B	Sabancı University	0	0
BdTR2C	Sabancı University	0	0.106443
BdTR2D	Sabancı University	0	0.016902
BdTR2E	Sabancı University	0	0
BdTR2F	Sabancı University	0	0.0045045
BdTR2G	Sabancı University	0	0
BdTR2I	Sabancı University	0	0.00760684
BdTR2J	Sabancı University	0	0.0204002
BdTR2K	Sabancı University	0	0.0166667
BdTR2M	Sabancı University	0	0
BdTR2N	Sabancı University	0	0.028749
BdTR2O	Sabancı University	0	0.0155754
BdTR2P	Sabancı University	0	0.0640495
BdTR2R	Sabancı University	0	0
BdTR2S	Sabancı University	0	0.00555556
BdTR3A	Sabancı University	0	0
BdTR3B	Sabancı University	0	0
BdTR3F	Sabancı University	0	0.00680272
BdTR3G	Sabancı University	0	0.114583
BdTR3H	Sabancı University	0	0.0119048
BdTR3I	Sabancı University	0	0.0035461
BdTR3J	Sabancı University	0	0
BdTR3K	Sabancı University	0	0.0531814
BdTR3M	Sabancı University	0	0.0538005
BdTR3N	Sabancı University	0	0.018254
BdTR3O	Sabancı University	0	0.0137638
BdTR3P	Sabancı University	0	0.0596491
BdTR3R	Sabancı University	0	0
BdTR3S	Sabancı University	0	0.00340136
BdTR3T	Sabancı University	0	0.00362319
BdTR5A	Sabancı University	0	0
BdTR5B	Sabancı University	0	0
BdTR5C	Sabancı University	0	0.0152572
BdTR5D	Sabancı University	0	0
BdTR5E	Sabancı University	0	0
BdTR5F	Sabancı University	0	0
BdTR5G	Sabancı University	0	0
BdTR5H	Sabancı University	0	0
BdTR5I	Sabancı University	0	0
BdTR5J	Sabancı University	0	0
BdTR5K	Sabancı University	0	0.00694444
BdTR5M	Sabancı University	0	0
BdTR5N	Sabancı University	0	0.0144157
BdTR5O	Sabancı University	0	0.00490196
BdTR9A	Sabancı University	0	0.0412698
BdTR9B	Sabancı University	0	0.0447382
BdTR9C	Sabancı University	0	0.0047619
BdTR9D	Sabancı University	0	0.0310899
BdTR9E	Sabancı University	0	0
BdTR9F	Sabancı University	0	0
BdTR9G	Sabancı University	0	0
BdTR9H	Sabancı University	0	0
BdTR9I	Sabancı University	0	0
BdTR9J	Sabancı University	0	0
BdTR9K	Sabancı University	0	0
BdTR9M	Sabancı University	0	0
BdTR10A	Sabancı University	0	0.0104167
BdTR10B	Sabancı University	0	0.0042735
BdTR10C	Sabancı University	0	0.0821566
BdTR10D	Sabancı University	0	0.00877193
BdTR10E	Sabancı University	0	0.0523649
BdTR10F	Sabancı University	0	0.00490196
BdTR10G	Sabancı University	0	0
BdTR10H	Sabancı University	0	0.0767471
BdTR10I	Sabancı University	0	0
BdTR10J	Sabancı University	0	0
BdTR10K	Sabancı University	0	0
BdTR10M	Sabancı University	0	0.0116279
BdTR10N	Sabancı University	0	0.0948044
BdTR10O	Sabancı University	0	0.0668056
BdTR11A	Sabancı University	0	0.00953159
BdTR11B	Sabancı University	0	0.0297619
BdTR11C	Sabancı University	0	0.0349464
BdTR11D	Sabancı University	0	0.0395935
BdTR11E	Sabancı University	0	0.110532
BdTR11F	Sabancı University	0	0.0427632
BdTR11G	Sabancı University	0	0.0493064
BdTR11H	Sabancı University	0	0.0483603
BdTR11I	Sabancı University	0	0.0521926
BdTR12A	Sabancı University	0	0.0704736
BdTR12B	Sabancı University	0	0.0631653
BdTR12C	Sabancı University	0	0.0318825
BdTR13A	Sabancı University	0	0
BdTR13B	Sabancı University	0	0
BdTR13C	Sabancı University	0	0.0546745
BdTR13D	Sabancı University	0	0.326968
BdTR13E	Sabancı University	0	0
BdTR13F	Sabancı University	0	0.00617284
BdTR13G	Sabancı University	0	0
BdTR13H	Sabancı University	0	0
BdTR13I	Sabancı University	0	0
BdTR13J	Sabancı University	0	0
BdTR13K	Sabancı University	0	0
BdTR13M	Sabancı University	0	0
BdTR13N	Sabancı University	0	0
BdTR13O	Sabancı University	0	0
018-1	John Innes Centre	3.5	0.825048
019-25	John Innes Centre	0.5	0.229775
Bd1-1	USDA-ARS	2	0.431863	3	0.783535
Bd2-3	USDA-ARS	0	0.00505051	0	0
Bd3-1	USDA-ARS	0	0.00793651	0	0.0139803
Bd18-1	USDA-ARS	0	0.027027	0	0.015773
gU5.1	Universidad Politécnica de Madrid	0.5	0.0573748	0	0.00833333
gU6.1	Universidad Politécnica de Madrid	0	0.0114943	0	0
HU3.4	Universidad Politécnica de Madrid	0	0.0520202	0	0.0482053
J6.2	Universidad Politécnica de Madrid	3	0.560454	2	0.494511
Sg1.2	Universidad Politécnica de Madrid	0	0.193915	0.5	0
Sg2.1	Universidad Politécnica de Madrid	0	0.0263338	0	0
